# Supplementary material for: Synthesis, crystal structure, DFT calculations, protein interaction, anticancer potential and bromoperoxidase mimicking activity of oxidoalkoxidovanadium(v) complexes
Source: Royal Society of Chemistry journal article supplement (doi:10.1039/c9nj02471a), 2019-01-01
Supplement: c9nj02471a1.pdf [file c9nj02471a1.pdf]

## New Journal of Chemistry

Electronic Supplementary Information (ESI)

### Syntheses, crystal structure, DFT calculations, protein interaction, anticancer potential and bromoperoxidase mimicking activity of oxidoalkoxidovanadium(V) complexes

Debanjana Biswal<sup>a</sup>, Nikhil Ranjan Pramanik<sup>\*b</sup>, Michael G.B Drew<sup>c</sup>, Nancy Jangra<sup>d</sup>, Mannar R. Maurya<sup>d</sup>, Mousumi Kundu<sup>e</sup>, Parames C. Sil<sup>e</sup>, Syamal Chakrabarti<sup>\*a</sup>

<sup>a</sup>Department of Chemistry, University College of Science, 92, Acharya Prafulla Chandra Road, Kolkata:700009, West Bengal, India.

<sup>b</sup>Department of Chemistry, Bidhannagar College, EB-2, Salt Lake, Kolkata: 700064, India.

<sup>c</sup>Department of Chemistry, The University of Reading, Whiteknights, Reading RG6 6AD, UK.

<sup>d</sup>Department of Chemistry, Indian Institute of Technology Roorkee, Roorkee-247667, India.

<sup>e</sup>Division of Molecular Medicine, Bose Institute, P-1/12, CIT Scheme VII M, Kolkata 700054, India.

---

#### Table of Contents:

**Fig. S1** Single crystals of [VOL(OPr)(H<sub>2</sub>O)] (**2**) isolated by solvent evaporation at low temperature.

**Fig. S2** ESI-MS of [VOL(OBu)(H<sub>2</sub>O)] (**3**).

**Fig. S3** IR spectra of complexes (**a**) [VOL(OEt)(H<sub>2</sub>O)] (**1**), (**b**) [VOL(OPr)(H<sub>2</sub>O)] (**2**) and (**c**) [VOL(OBu)(H<sub>2</sub>O)] (**3**) in KBr pellets.

**Fig. S4** <sup>1</sup>H NMR spectrum of complexes (**a**) [VOL(OEt)(H<sub>2</sub>O)] (**1**), (**b**) [VOL(OPr)(H<sub>2</sub>O)] (**2**) and (**c**) [VOL(OBu)(H<sub>2</sub>O)] (**3**) in DMSO-d<sub>6</sub>.

**Fig. S5** Electronic spectrum of complexes (**a**) [VOL(OEt)(H<sub>2</sub>O)] (**1**), (**b**) [VOL(OPr)(H<sub>2</sub>O)] (**2**) and (**c**) [VOL(OBu)(H<sub>2</sub>O)] (**3**) in water at room temperature.

**Fig. S6** TG-DTA curve of complex [VOL(OEt)(H<sub>2</sub>O)] (**1**) under N<sub>2</sub> atmosphere.

**Fig. S7** The frontier orbitals in complex [VOL(OEt)(H<sub>2</sub>O)] (**1**).

**Fig. S8** The frontier orbitals in complex [VOL(OPr)(H<sub>2</sub>O)] (**2**).

**Fig. S9** CD spectra of BSA ( $1 \times 10^{-5}$  M) in the UV-region in the absence and presence of the complexes **1-3** ( $2 \times 10^{-5}$  M) at 25°C and pH 7.

**Table S1** CD secondary structure estimation of BSA in the absence and presence of complexes **1-3** using CDNN Software

**Table S2** Results of molecular docking: Adjacent residues and hydrogen bonding interactions

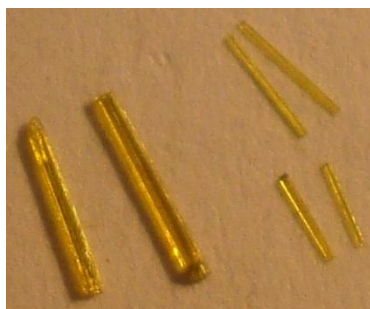

**Fig. S1** Single crystals of [VOL(OPr)(H<sub>2</sub>O)] (**2**) isolated by solvent evaporation at low temperature.

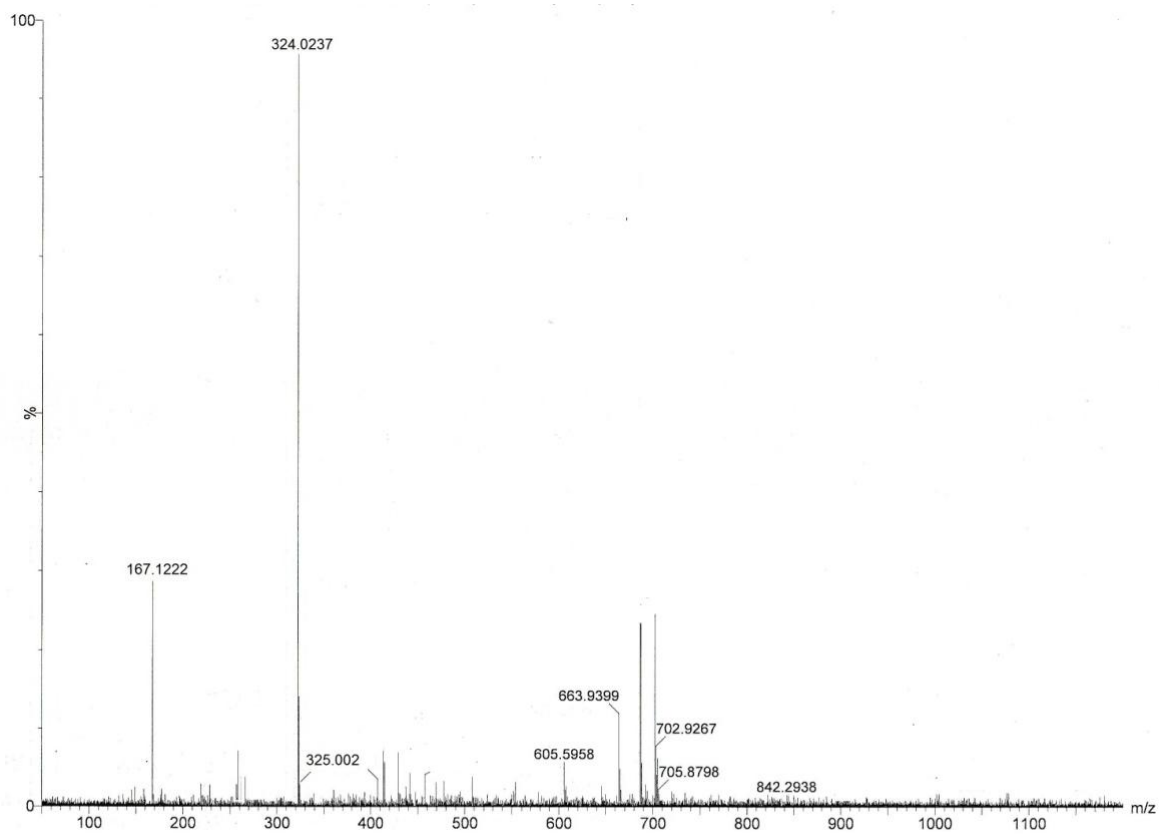

**Fig. S2** ESI-MS of [VOL(OBu)(H<sub>2</sub>O)] (3).

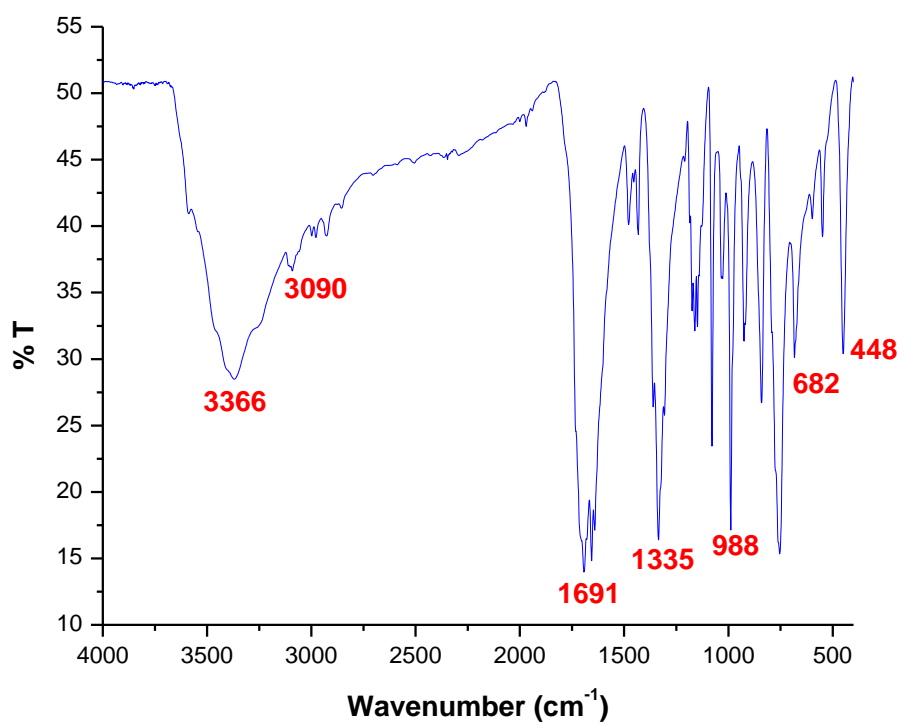

**(a)**

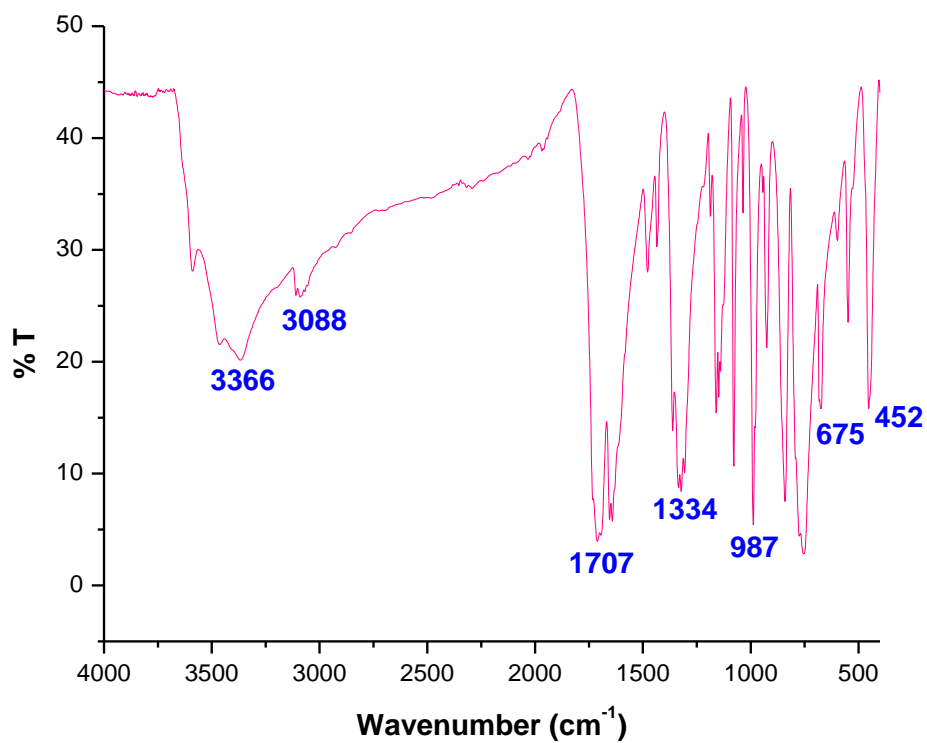

(b)

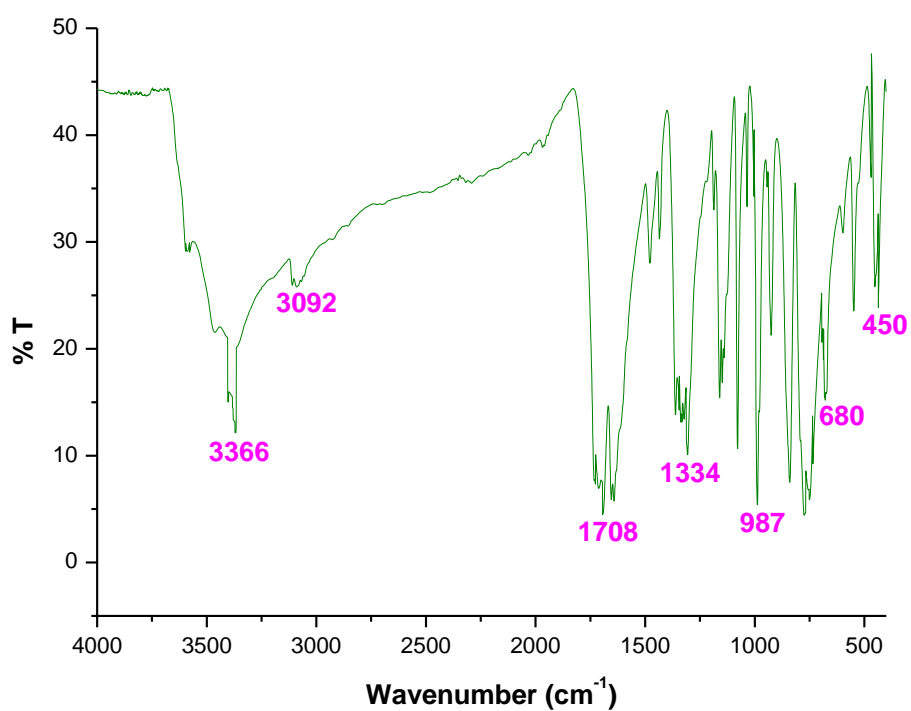

(c)

**Fig. S3** IR spectra of complexes (a) [VOL(OEt)(H<sub>2</sub>O)] (1), (b) [VOL(OPr)(H<sub>2</sub>O)] (2) and (c) [VOL(OBu)(H<sub>2</sub>O)] (3) in KBr pellets.

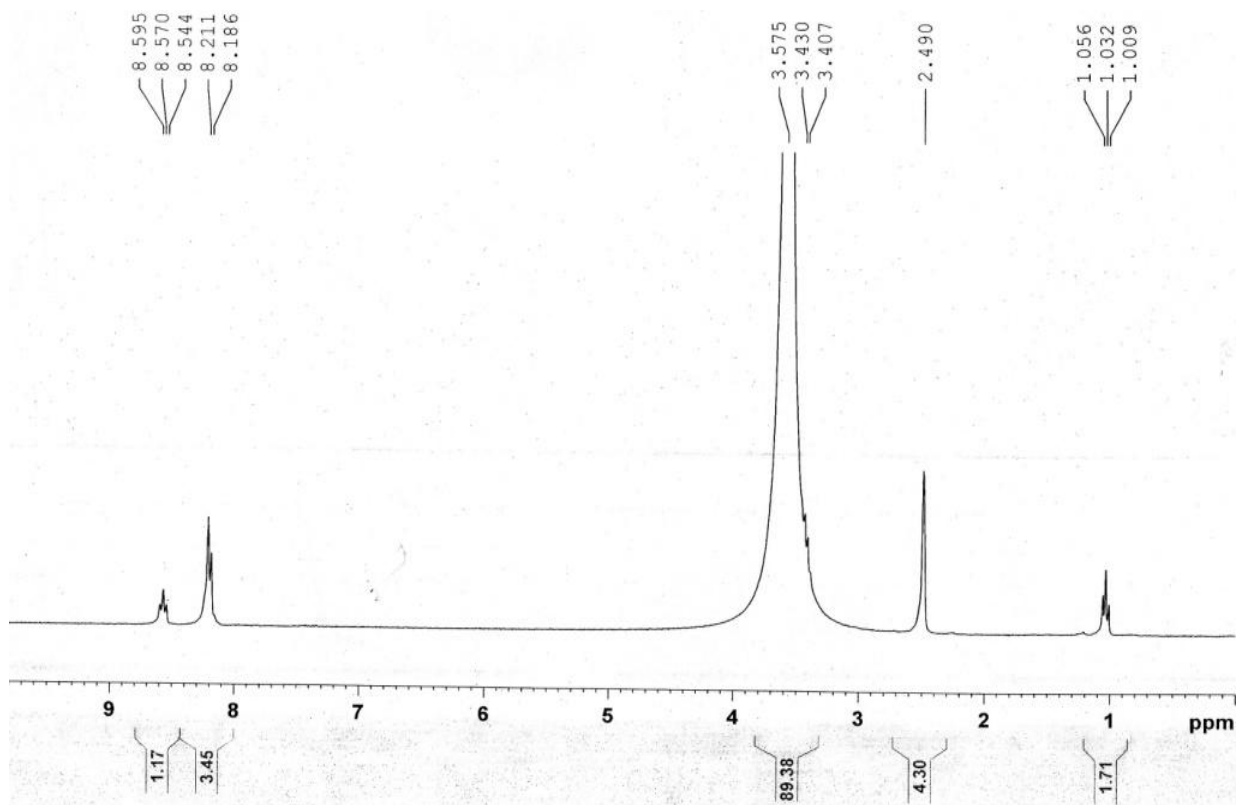

(a)

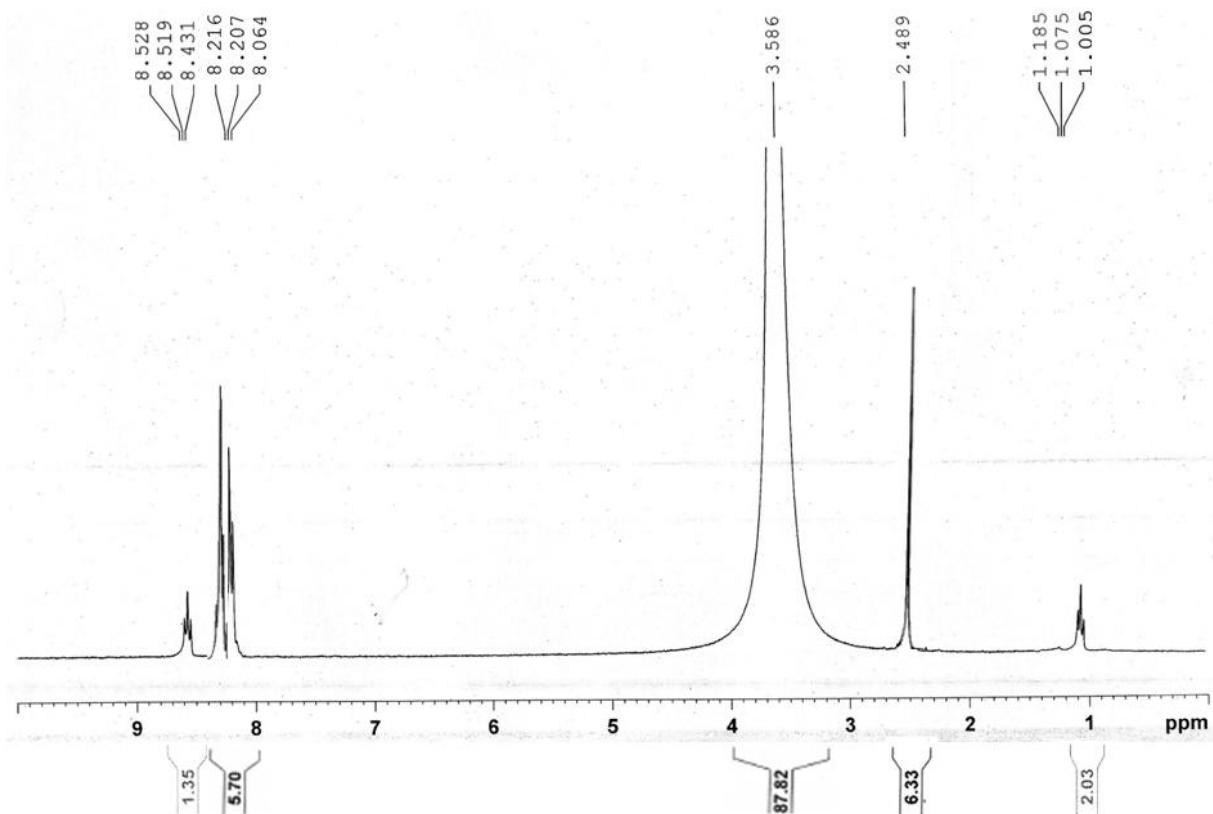

(b)

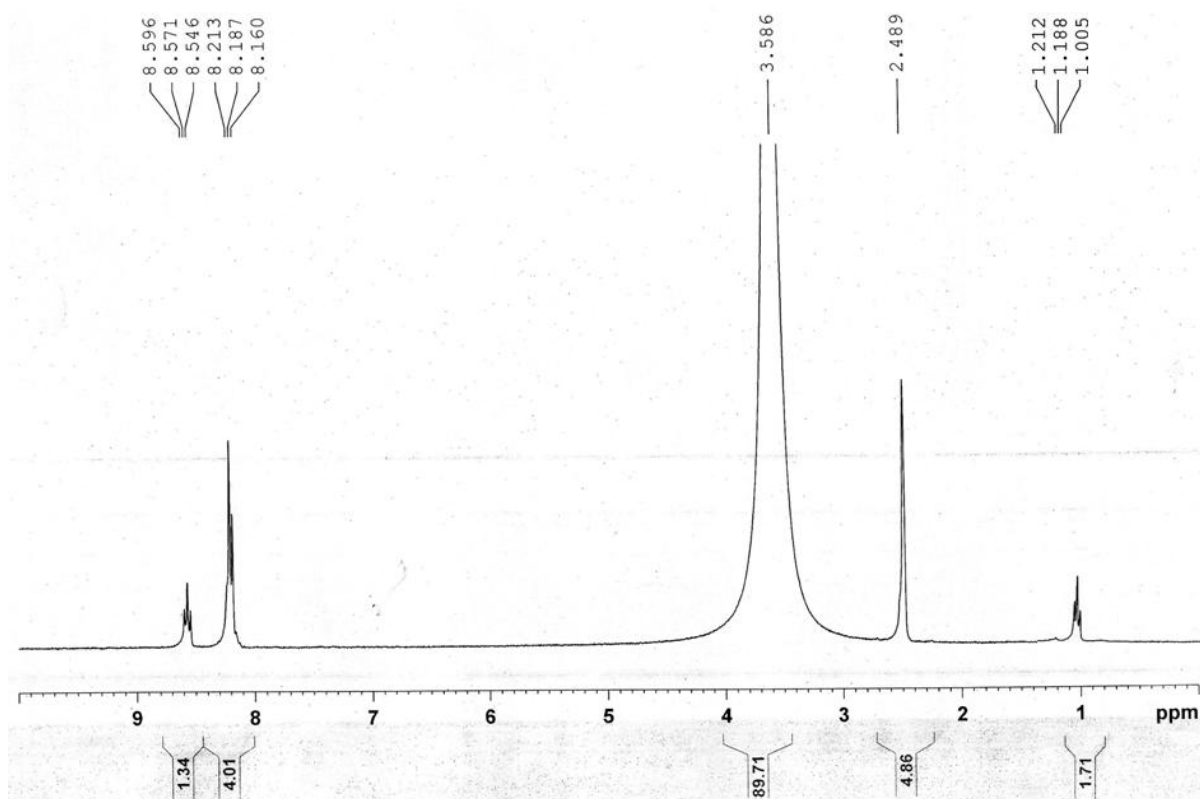

(c)

**Fig. S4**  $^1\text{H}$  NMR spectrum of complexes (a)  $[\text{VOL}(\text{OEt})(\text{H}_2\text{O})]$  (1), (b)  $[\text{VOL}(\text{OPr})(\text{H}_2\text{O})]$  (2) and (c)  $[\text{VOL}(\text{OBu})(\text{H}_2\text{O})]$  (3) in  $\text{DMSO-d}_6$ .

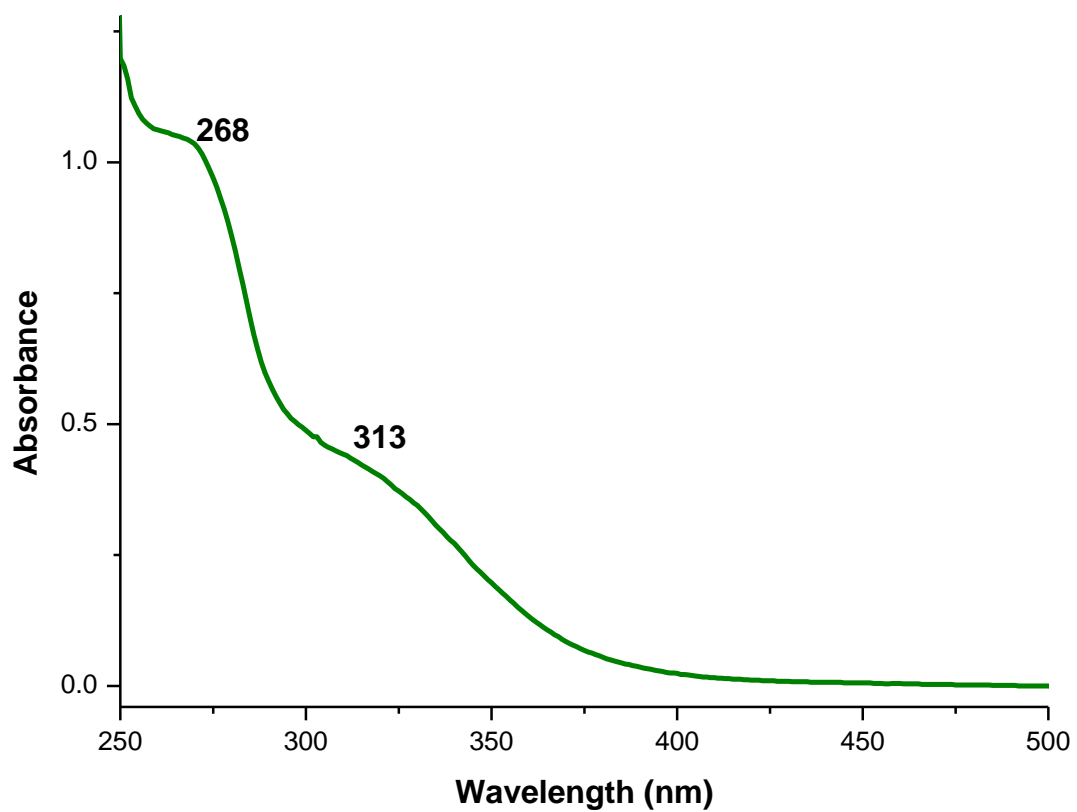

(a)

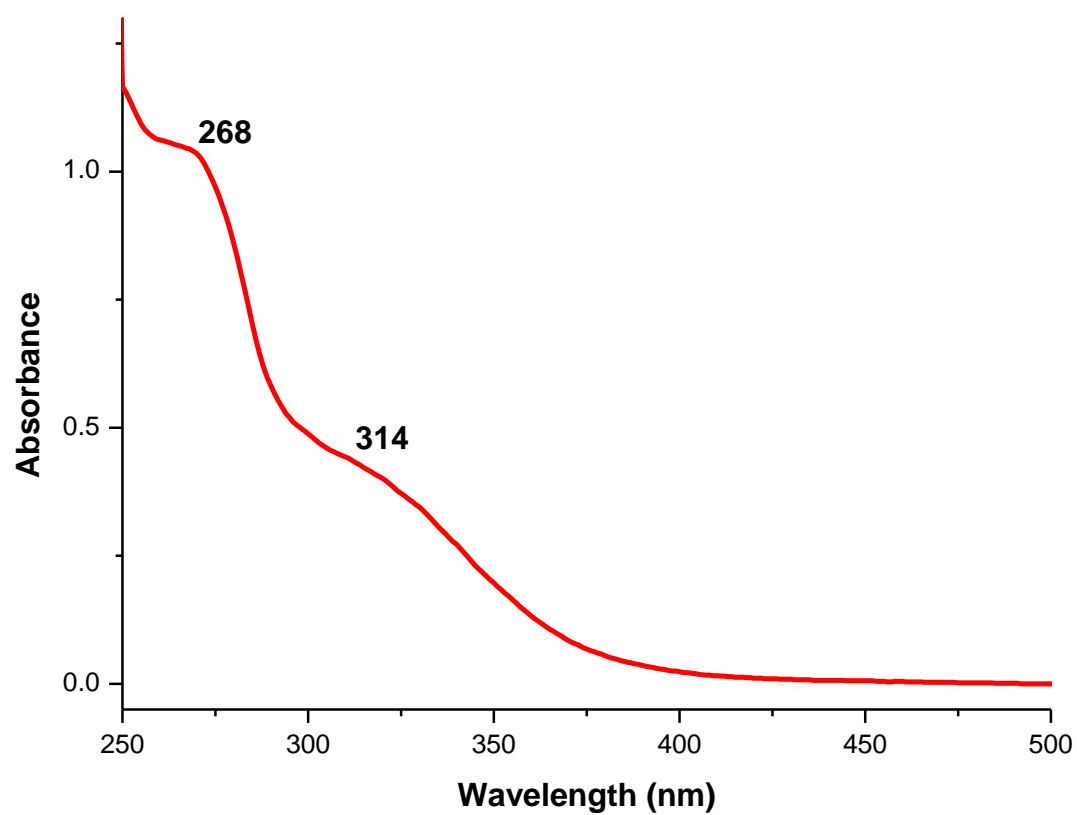

(b)

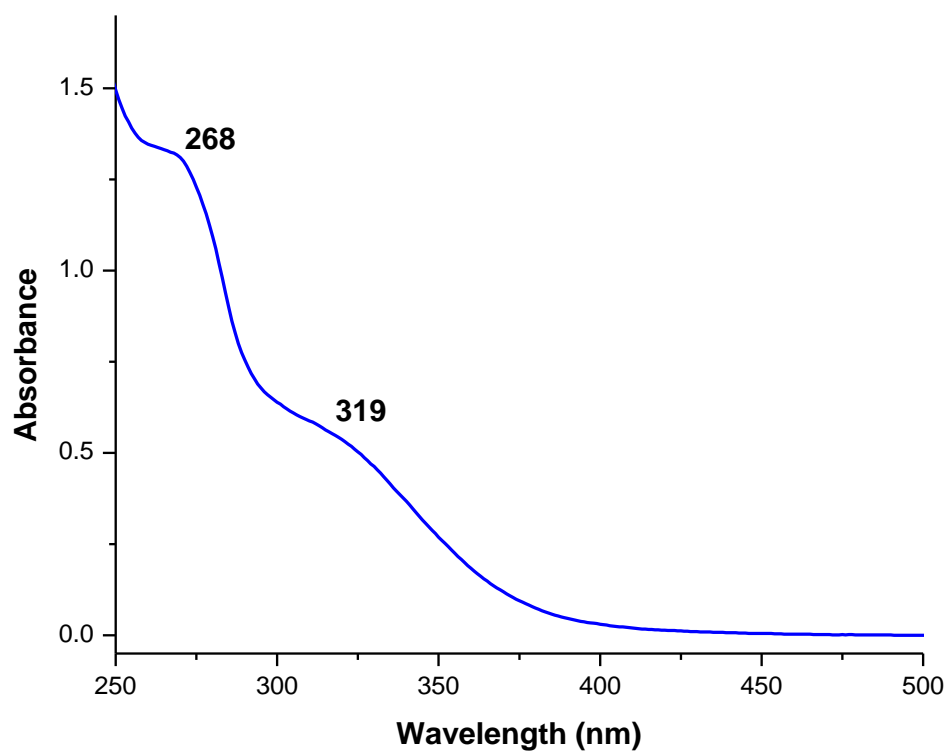

(c)

**Fig. S5** Electronic spectrum of complexes (a) [VOL(OEt)(H<sub>2</sub>O)] (1), (b) [VOL(OPr)(H<sub>2</sub>O)] (2) and (c) [VOL(OBu)(H<sub>2</sub>O)] (3) in water at room temperature.



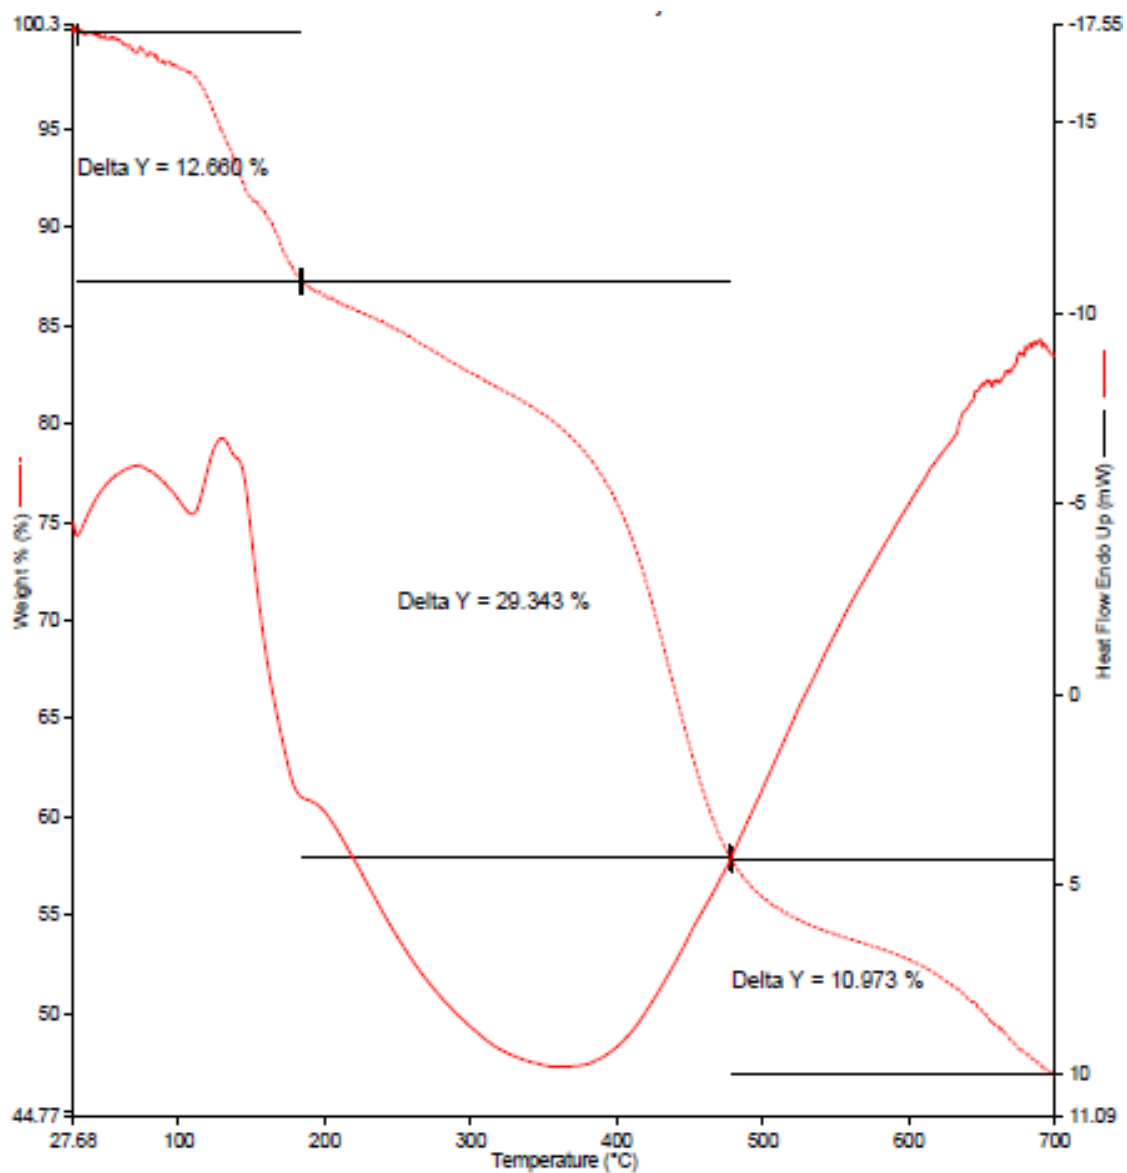

**Fig. S6** TG-DTA curve of complex [VOL(OEt)(H<sub>2</sub>O)] (1) under N<sub>2</sub> atmosphere.

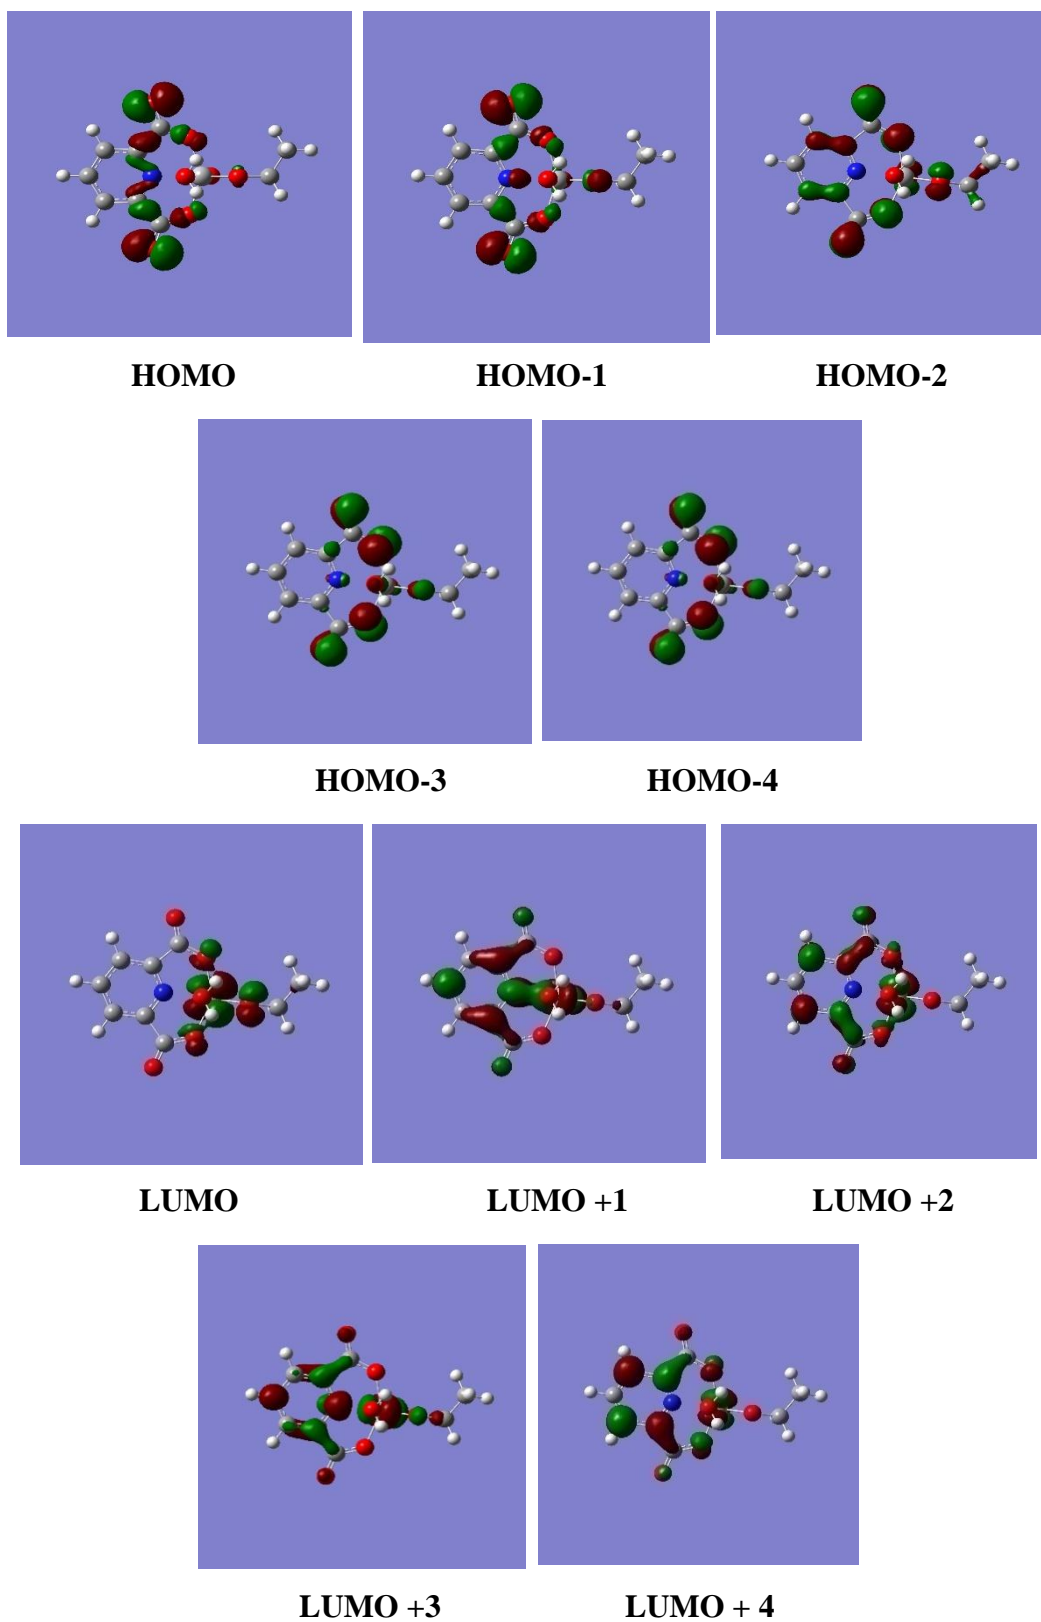

**Fig. S7** The frontier orbitals in complex [VOL(OEt)(H<sub>2</sub>O)] (1).

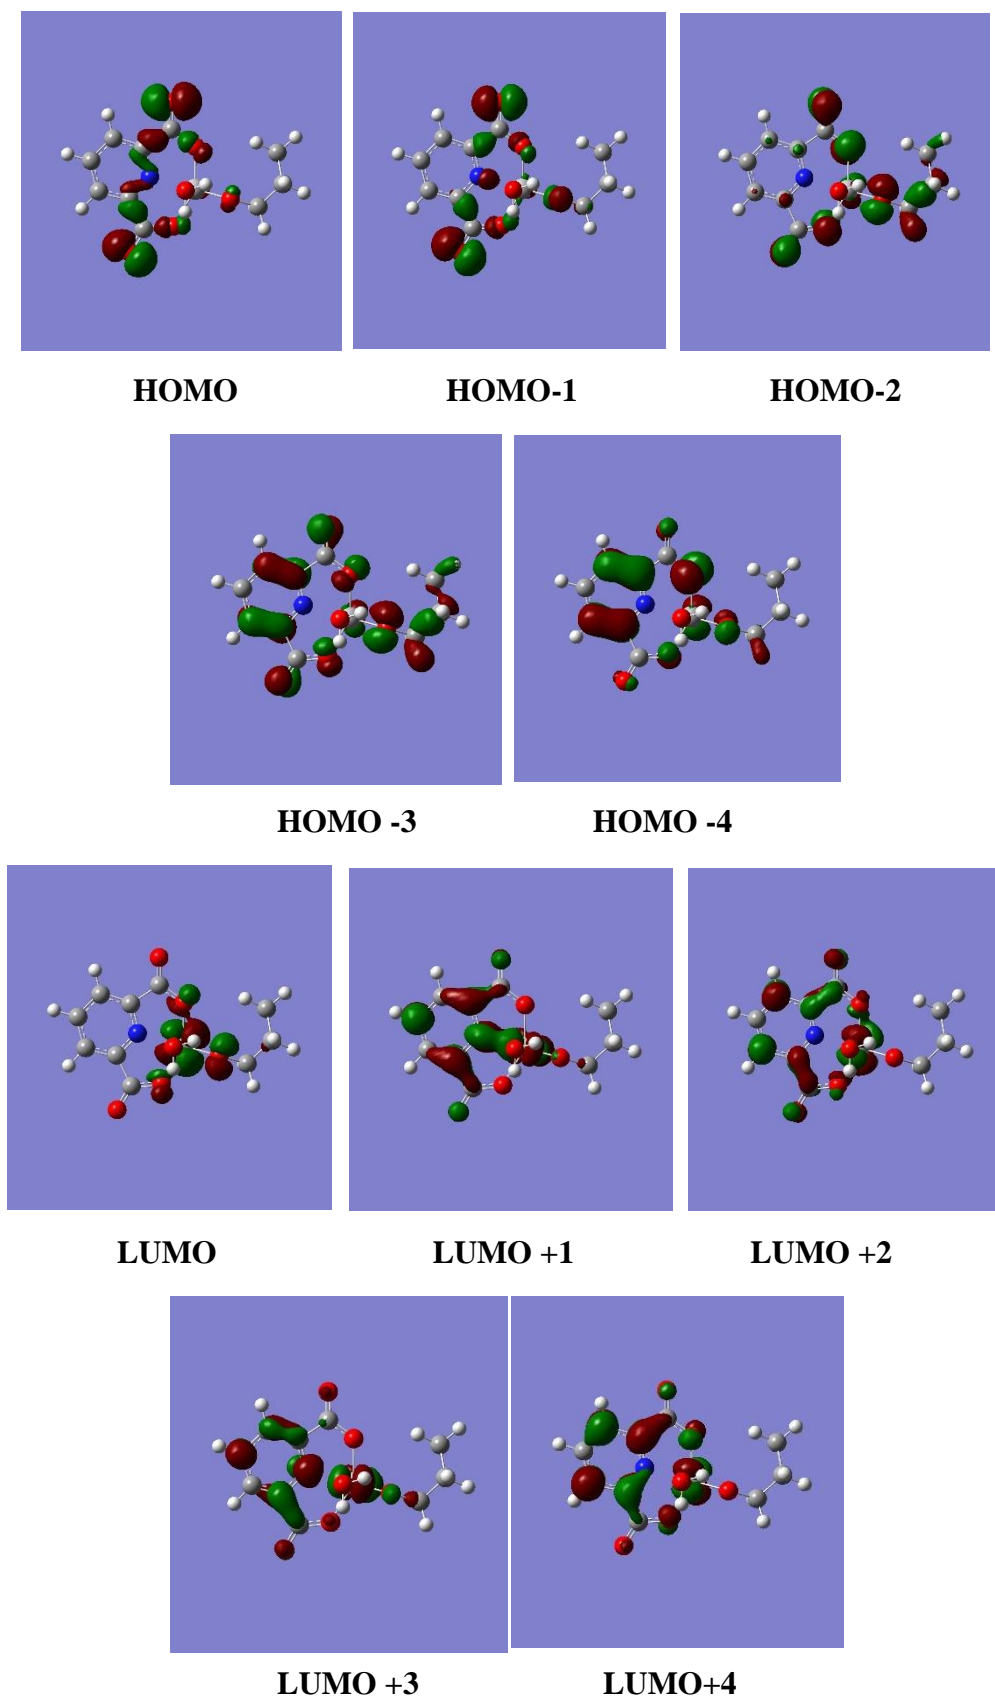

**Fig. S8** The frontier orbitals in complex [VOL(OPr)(H<sub>2</sub>O)] (2).

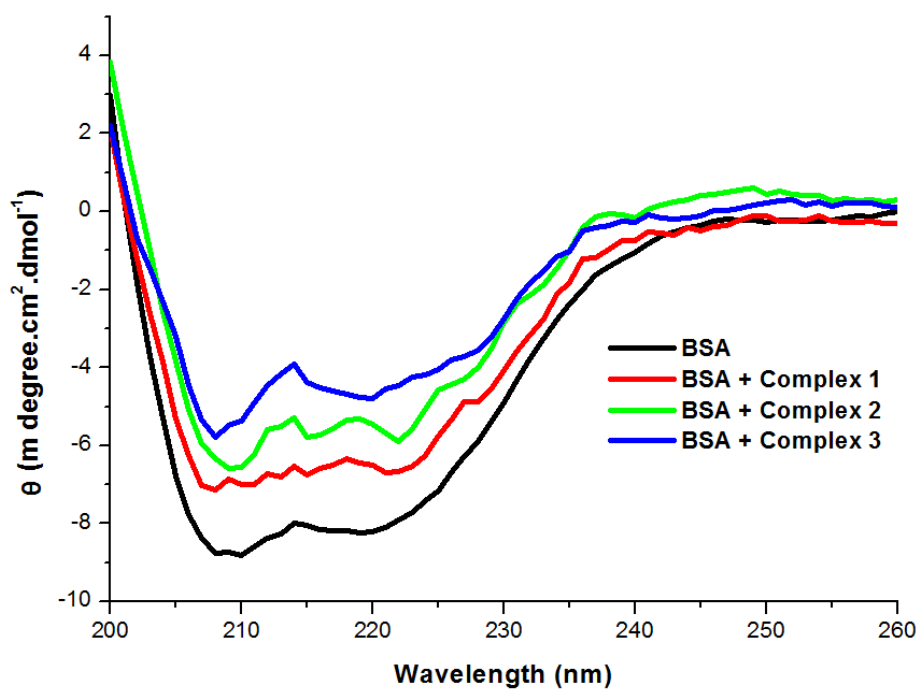

**Fig. S9** CD spectra of BSA ( $1 \times 10^{-5}$  M) in the UV-region in the absence and presence of the complexes **1-3** ( $2 \times 10^{-5}$  M) at 25°C and pH 7.

**Table S1**

CD secondary structure estimation of BSA in the absence and presence of complexes **1-3** using CDNN Software

| Components conformation           | Free BSA<br>( $1 \times 10^{-5}$ M) | BSA +<br>Complex 1<br>( $2 \times 10^{-5}$ M) | BSA +<br>Complex 2<br>( $2 \times 10^{-5}$ M) | BSA +<br>Complex 3<br>( $2 \times 10^{-5}$ M) |
|-----------------------------------|-------------------------------------|-----------------------------------------------|-----------------------------------------------|-----------------------------------------------|
| $\alpha$ -Helix (%)               | 85.0                                | 72.2                                          | 66.3                                          | 52.0                                          |
| $\beta$ -sheet (Antiparallel) (%) | 1.3                                 | 2.4                                           | 3.0                                           | 4.8                                           |
| $\beta$ -sheet (Parallel) (%)     | 1.5                                 | 2.6                                           | 3.4                                           | 5.1                                           |
| $\beta$ -Turn (%)                 | 9.3                                 | 11.3                                          | 12.1                                          | 14.1                                          |
| Random Coil (%)                   | 7.0                                 | 12.0                                          | 15.2                                          | 21.0                                          |

**Table S2**

Results of molecular docking: Adjacent residues and hydrogen bonding interactions

| <b>Complexes</b> | <b>Hydrogen bonding interactions</b>                                                                                                                                          | <b>Adjacent amino acids</b>                                                           |
|------------------|-------------------------------------------------------------------------------------------------------------------------------------------------------------------------------|---------------------------------------------------------------------------------------|
| BSA···Complex 1  | (Arg-198)-NH-H···O=V = 1.6 Å<br>(Arg-198)-N-H···O=V = 2.7 Å<br>(Arg-217)-NH-H···O=C = 2.7 Å                                                                                   | Tyr-149, Tyr-155, Tyr-156,<br>Arg-194, Arg-198, Arg-217,<br>Arg-256, Ala-290, Glu-291 |
| BSA···Complex 2  | (Arg-198)-NH- <b>H</b> ···O=V = 1.5 Å<br>(Arg-198)- <b>NH</b> -H···O=V = 2.7 Å<br>(Arg-198)-N-H···O=V = 2.8 Å<br>(Arg-217)-NH-H···O=C = 2.4 Å<br>(Arg-217)-NH-H···O-C = 2.7 Å | Tyr-149, Tyr-155, Tyr-156,<br>Ser-191, Arg-194, Arg-198,<br>Arg-217, Ile-263, Ala-290 |
